# Supplementary material
Source: PubMed Central journal article supplement (PMC4336363)
Supplement: mmc1.pdf [file mmc1.pdf]

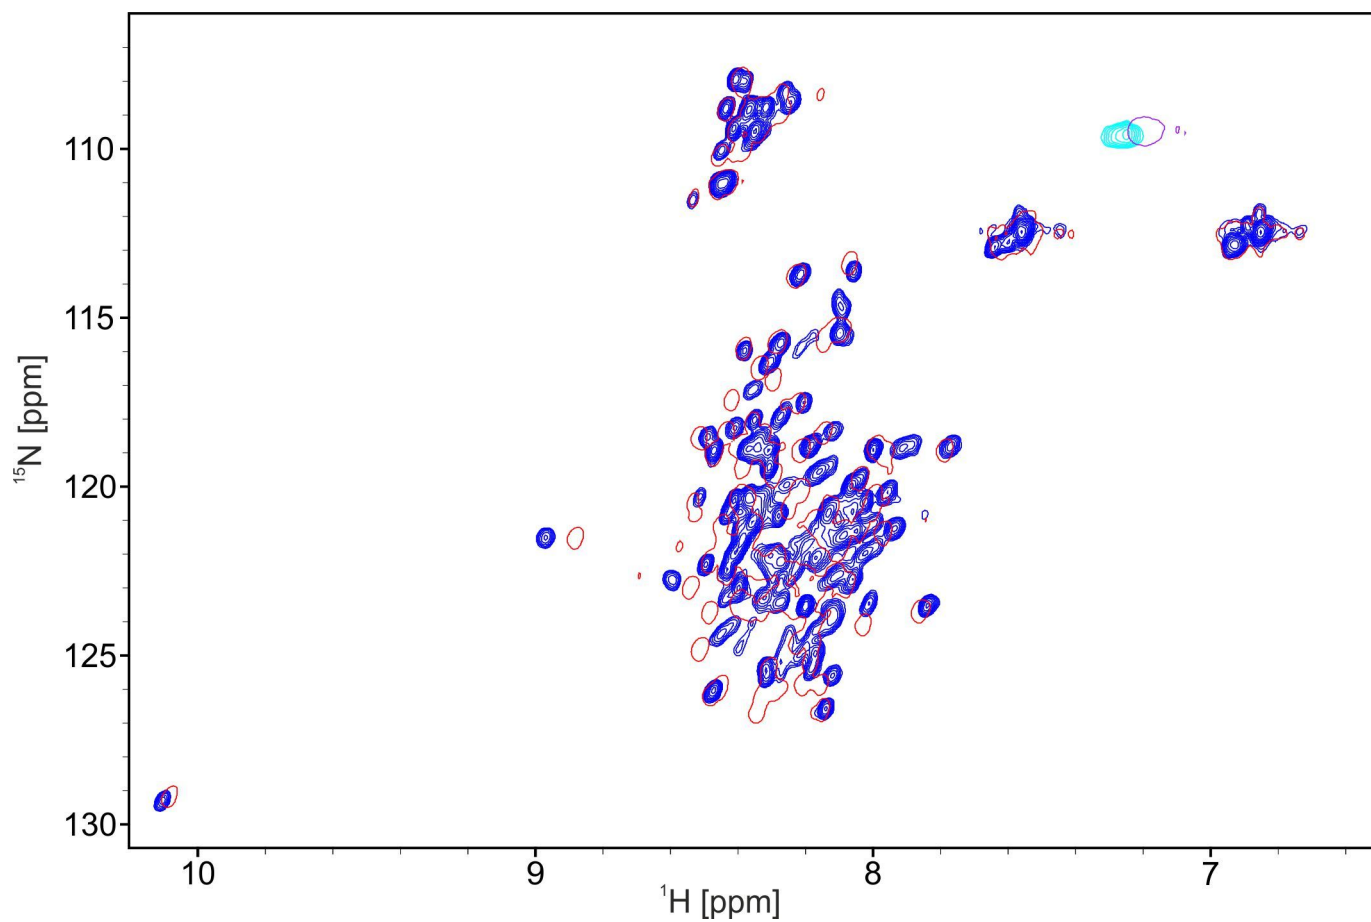

FIGURE S1 Overlay of  $^1\text{H}$ ,  $^{15}\text{N}$ -HSQC spectra of A2A-ctL (single red contour) and A2A-ctL in 10 % TFE (blue contours). Peaks drawn in magenta and cyan originate from aliased arginine sidechain  $\text{N}^\epsilon$ - $\text{H}^\epsilon$  groups.

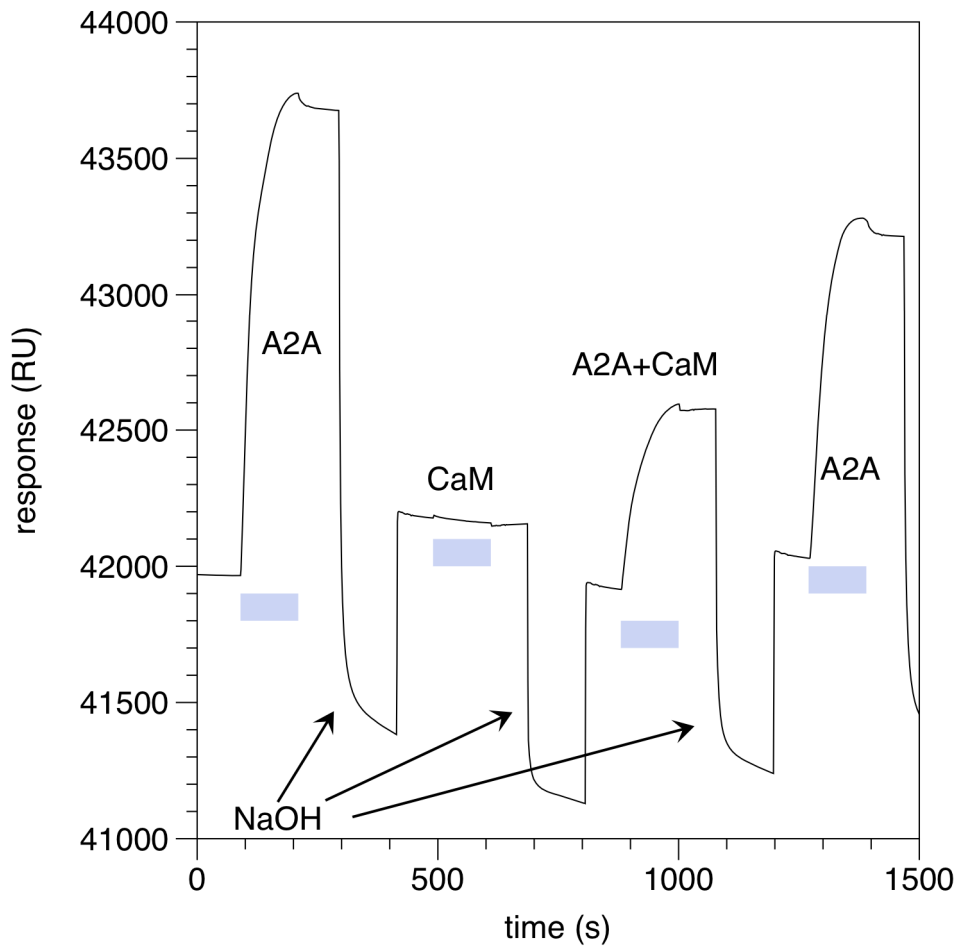

FIGURE S2 Binding of A2A-ctL, CaM and the A2A-ctL-CaM complex to lipid vesicles measured with SPR. The durations of the protein injections are indicated by the shaded light blue areas. Between protein injections, regeneration with NaOH was carried out (arrows). The first and last protein (A2A-ctL) injections were identical, showing a specific effect on the amount of membrane-bound protein by CaM.

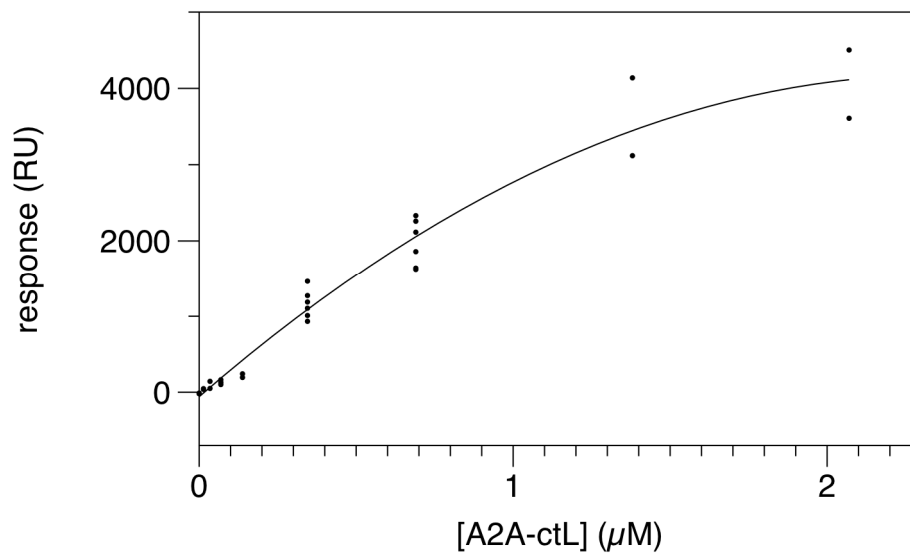

FIGURE S3 Titration of A2A-ctL binding onto immobilized lipid vesicles using SPR. A  $K_d$  value of approximately 1  $\mu\text{M}$  can be estimated for the protein-membrane interaction. All individual data points are shown on the graph.

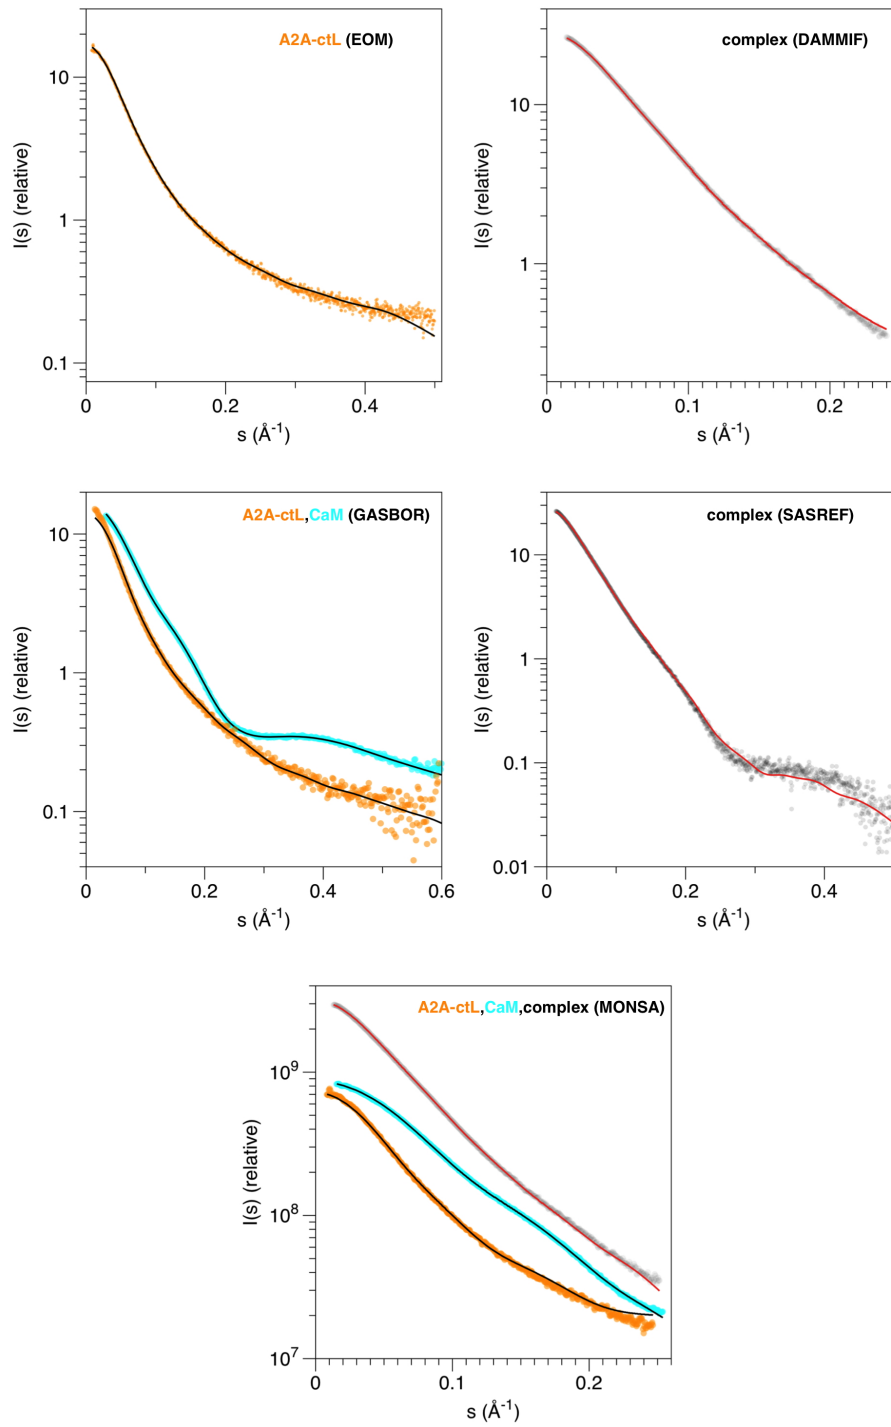

FIGURE S4 Fitting of the different SAXS models to the raw scattering data. The data for A2A-ctL are in orange, for CaM in cyan, and for the complex in gray, and the fitting curve for the latter is in red. The corresponding models are shown within the main text, in Figure 7.

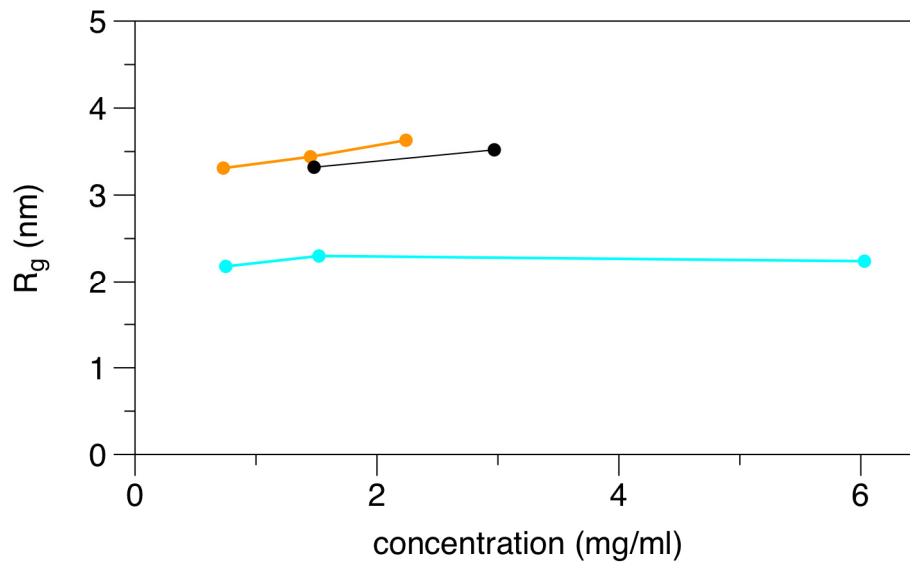

FIGURE S5 Dependence of the radius of gyration on protein concentration. The shown  $R_g$  values are obtained from Guinier analysis. CaM, cyan; A2A-ctL, orange; complex, black.

TABLE S1 SAXS modeling Chi-values.

| Program | Sample                                                   | Chi |
|---------|----------------------------------------------------------|-----|
| EOM     | A2A-ctL                                                  | 0.8 |
| DAMMIF  | Complex                                                  | 1.3 |
| SASREF  | Complex (using models of the components built by GASBOR) | 1.6 |
| MONSA   | A2A-ctL                                                  | 1.4 |
|         | CaM                                                      | 1.1 |
|         | complex                                                  | 1.1 |



|                |               |                       |                        |             |   |   |             |               |                |   |
|----------------|---------------|-----------------------|------------------------|-------------|---|---|-------------|---------------|----------------|---|
| PTGER4         | P35408        | SDFRRRSFRRIAGA        | 888888999999998        | 4,57        |   | x | ICL3        |               |                | A |
| <b>CRHR1</b>   | <b>P34998</b> | <b>YCFLNSEVRSAIRK</b> | <b>999999999999999</b> | <b>4,50</b> | x | x | <b>CT</b>   |               | (6)            | B |
| ADRB2          | P07550        | VFVYSRVFQEAKRQ        | 899999999999998        | 4,43        |   | x | ICL3        | 341           | (7-9)          | A |
| DRD3           | P35462        | VYARIYVVLKQRRR        | 899999999999998        | 4,43        |   | x | ICL3        |               |                | A |
| ADRB3          | P13945        | FVVATRQLRLLRGE        | 899999999999998        | 4,43        |   | x | ICL3        | 361           | similarity     | A |
| MTLR1          | O43193        | GRERGHRTVVRVLL        | 899999999999998        | 4,43        |   | x | ICL3        |               |                | A |
| OR10H2         | O60403        | SLRNKELKVAMKRT        | 899999999999998        | 4,43        | x | x | CT          |               |                | A |
| GPR10          | P49683        | IARVRRLLHNVTFN        | 899999999999998        | 4,11        |   | x | ICL1        |               |                | A |
| TACR3          | P29371        | ILAHKRMRTVTNY         | 899999999999998        | 4,11        |   | x | ICL1        | 374           | sequence       | A |
| HCRT1          | O43613        | STARRARGSILGI         | 899999999999998        | 4,11        |   | x | ICL2        |               |                | A |
| DRD4           | P21917        | TFRGLQRWEVARR         | 899999999999998        | 4,11        |   | x | ICL3        |               |                | A |
| LGR7           | Q9HBX9        | NQVKKEMILAKRF         | 899999999999998        | 4,11        |   | x | ICL3        |               |                | A |
| OR10H1         | Q9Y4A9        | RNKELKVAMKKT          | 899999999999998        | 4,11        | x |   | CT          |               |                | A |
| OPN4           | Q9UHM6        | RAIRETGRALQTF         | 899999999999998        | 4,11        |   | x | ICL3        |               |                | A |
| <b>CASR</b>    | <b>P41180</b> | <b>AFKVAARATLRRS</b>  | <b>899999999999998</b> | <b>4,11</b> | x |   | <b>CT</b>   | (10)          |                | C |
| ADRA1A         | P35348        | RVYVVAKRESRGL         | 899999999999998        | 4,11        |   | x | ICL3        | 345           | sequence       | A |
| <b>ADORA2A</b> | <b>P29274</b> | <b>YRIREFRQTFRKI</b>  | <b>889999999999998</b> | <b>4,07</b> | x | x | <b>CT</b>   | (11)          |                | A |
| <b>DRD2</b>    | <b>P14416</b> | <b>IKIYIVLRRRRKR</b>  | <b>888888888888998</b> | <b>4,07</b> |   | x | <b>ICL3</b> | (12)          |                | A |
| CHRM2          | P08172        | TVLYWHISRASKSR        | 888888888888888        | 4,00        |   | x | ICL3        |               |                | A |
| CHRM5          | P08912        | RVVLVKERKAAQT         | 888899999999998        | 4,00        |   | x | ICL3        |               |                | A |
| PTGER4         | P35408        | EKIKCLFCRIGGSR        | 888888888888888        | 4,00        | x |   | CT          |               |                | A |
| <b>CHRM3</b>   | <b>P20309</b> | <b>TKRKRMSLVKEK</b>   | <b>899999999999998</b> | <b>3,79</b> |   | x | <b>ICL3</b> | (3)           |                | A |
| TACR2          | P21452        | IILAHRRMRTVT          | 899999999999998        | 3,79        |   | x | ICL1        | 324           | sequence       | A |
| HCRT1          | O43613        | LSGKFREQFKAA          | 899999999999998        | 3,79        | x |   | CT          |               |                | A |
| HTR5A          | P47898        | IYKAAKFRVGSR          | 899999999999998        | 3,79        |   | x | ICL3        |               |                | A |
| GHSR           | Q92847        | SLIGRKLWRRRR          | 899999999999998        | 3,79        |   | x | ICL3        |               |                | A |
| GPR1           | P46091        | WFTGFKWKKTVT          | 899999999999998        | 3,79        |   | x | ICL1        |               |                | A |
| OPRM1          | P35372        | IVRYTKMKTATN          | 899999999999998        | 3,79        |   | x | ICL1        | 353           | sequence       | A |
| HTR6           | P50406        | TKHSRKALKASL          | 899999999999988        | 3,75        |   | x | ICL3        |               |                | A |
| GALR1          | P47211        | RRSSSLRVS RNA         | 899999999999888        | 3,75        |   | x | ICL2        | 320           | similarity     | A |
| MTLR1          | O43193        | ISKKYRAAAF            | 888999999999998        | 3,71        | x | x | CT          |               |                | A |
| NTSR2          | O95665        | LVRHKDVRRI            | 889999999999888        | 3,71        |   | x | ICL3        | 377           | sequence       | A |
| EDNRB          | P24530        | DRYRAVASWSRI          | 899988888888888        | 3,54        |   | x | ICL2        | 402, 403, 405 | (13), sequence | A |
| GALR2          | O43603        | KHFRKGFRTIC           | 899999999999998        | 3,46        | x |   | CT          |               |                | A |



|              |               |                    |                    |             |          |          |             |          |            |          |   |
|--------------|---------------|--------------------|--------------------|-------------|----------|----------|-------------|----------|------------|----------|---|
| GPR50        | Q13585        | VTKNKKLRNSG        | 8999999998         | 3,46        |          | x        | ICL1        |          |            | A        |   |
| LTB4R        | Q15722        | SILKRMQKRSV        | 8999999998         | 3,46        |          | x        | ICL1        |          |            | A        |   |
| ADRA2B       | P18089        | IFNQDFRRAFRR       | 888888888888       | 3,43        | x        | x        | CT          | 439      | sequence   | A        |   |
| DRD4         | P21917        | RQGGSRRLLLI        | 888888888888       | 3,43        |          | x        | ICL2        |          |            | A        |   |
| OR10J1       | P30954        | ASVEGRKKAFKA       | 89999999988        | 3,43        |          | x        | ICL3        |          |            | A        |   |
| AVPR1A       | P37288        | SISRAKIRTVK        | 88999999998        | 3,43        |          | x        | ICL3        | 365, 366 | similarity | A        |   |
| <b>CHRM1</b> | <b>P11229</b> | <b>KEKKAARTLSA</b> | <b>89999999888</b> | <b>3,39</b> |          | <b>x</b> | <b>ICL3</b> | (3)      |            | A        |   |
| ADRA2A       | P08913        | AVFTSRALKA         | 9999999999         | 3,21        |          | x        | ICL1        | 442      | similarity | A        |   |
| ADRA2C       | P18825        | AVLTSRALRA         | 9999999999         | 3,21        |          | x        | ICL1        |          |            | A        |   |
| EDG1         | P21453        | YSLVTRRSRR         | 8999999998         | 3,14        |          | x        | ICL3        | 328      | similarity | A        |   |
| HCRTR2       | O43614        | IKQIRARRKT         | 8999999998         | 3,14        |          | x        | ICL3        |          |            | A        |   |
| HRH1         | P35367        | AVRSERKLHT         | 8999999998         | 3,14        |          | x        | ICL1        |          |            | A        |   |
| HRH2         | P25021        | VGLNRRLRNL         | 8999999998         | 3,14        |          | x        | ICL1        | 305      | similarity | A        |   |
| MTNR1A       | P48039        | KEYRRIIVSL         | 8999999998         | 3,14        | x        |          | CT          |          |            | A        |   |
| <b>PTH1R</b> | <b>Q03431</b> | <b>WTLALDFKRK</b>  | <b>8999999998</b>  | <b>3,14</b> | <b>x</b> |          | <b>CT</b>   | (6)      |            | B        |   |
| <b>HTR2C</b> | <b>P28335</b> | <b>IYRRAFNSYL</b>  | <b>8899999998</b>  | <b>3,11</b> | <b>x</b> |          | <b>CT</b>   | (14)     |            | A        |   |
| DRD5         | P21918        | IVRSRHLRAN         | 89999999988        | 3,11        |          | x        | ICL1        | 375      | similarity | A        |   |
| HTR7         | P34969        | IFKREQKAAT         | 89999888888        | 3,00        |          | x        | ICL3        | 401      | sequence   | A        |   |
| HTR2B        | P41595        | AFGRYITCNY         | 88999888888        | 2,96        | x        |          | CT          | 397      | sequence   | A        |   |
| <b>VIPR1</b> | <b>P32241</b> | <b>EVQAELERRK</b>  | <b>999999999</b>   | <b>2,89</b> | <b>x</b> |          | <b>CT</b>   | (6)      |            | B        |   |
| <b>GLP2R</b> | <b>O95838</b> | <b>VKAELRKYW</b>   | <b>899999998</b>   | <b>2,82</b> | <b>x</b> |          | <b>CT</b>   | (6)      |            | B        |   |
| HTR1F        | P30939        | RAAKTLYHK          | 899999998          | 2,82        |          | x        | ICL3        |          |            | A        |   |
| ADRA2B       | P18089        | RRAQLTREK          | 899999998          | 2,82        |          | x        | ICL3        | 439      | sequence   | A        |   |
| ADORA3       | P33765        | TVRYKRVTT          | 889999988          | 2,75        |          | x        | ICL2        | 303      | sequence   | A        |   |
| DRD1         | P21728        | IAQKQIRRI          | 889999988          | 2,75        |          | x        | ICL3        | 347, 351 | (15)       | A        |   |
| PTGFR        | P43088        | AYQFRQKS           | 889999988          | 2,75        |          | x        | ICL1        |          |            | A        |   |
| <b>CALCR</b> | <b>P30988</b> | <b>WNQRWGRR</b>    | <b>99999999</b>    | <b>2,57</b> | <b>x</b> |          | <b>CT</b>   | (6)      |            | B        |   |
| <b>OPRM1</b> | <b>P35372</b> | <b>KEKDRNLR</b>    | <b>89999998</b>    | <b>2,50</b> |          | <b>x</b> | <b>ICL3</b> | (16)     | 353        | sequence | A |
| ADRA1A       | P35348        | LKFSREKK           | 89999998           | 2,50        |          | x        | ICL3        | 345      | sequence   | A        |   |
| ADRA1B       | P35368        | FSREKKA            | 89999998           | 2,50        |          | x        | ICL3        | 365      | sequence   | A        |   |
| ADRA1D       | P25100        | LLKFSREK           | 89999998           | 2,50        |          | x        | ICL3        | 419      | sequence   | A        |   |
| GNRHR        | P30968        | KKEKGKKL           | 88899988           | 2,39        |          | x        | ICL1        |          |            | A        |   |
| OPRD1        | P41143        | VRYTKMKT           | 88888888           | 2,29        |          | x        | ICL1        | 333      | sequence   | A        |   |
| <b>OPRD1</b> | <b>P41143</b> | <b>GSKEKDR</b>     | <b>8999998</b>     | <b>2,18</b> |          | <b>x</b> | <b>ICL3</b> | (16)     | 333        | sequence | A |

|    |           |        |                      |                    |      |   |                |      |          |          |   |
|----|-----------|--------|----------------------|--------------------|------|---|----------------|------|----------|----------|---|
|    | GPR1      | P46091 | QARFRSS              | 8999998            | 2,18 | x | CT             |      |          | A        |   |
|    | HTR1E     | P28566 | YARKRTA              | 8899988            | 2,11 |   | ICL2           |      |          | A        |   |
|    | HRH1      | P35367 | RTKTRA               | 888888             | 1,71 |   | ICL2           |      |          | A        |   |
| B) | ADCYAP1R1 | P41586 |                      |                    |      | x | CT             | (6)  |          | A        |   |
|    | GLP1R     | P43220 |                      |                    |      | x | CT             | (6)  |          | A        |   |
|    | AVPR2     | P30518 |                      |                    |      | x | CT             | (17) | 341, 342 | (4)      | A |
|    | HTR2A     | P28223 |                      |                    |      |   | ICL2           | (18) |          |          | A |
|    | HTR2A     | P28223 |                      |                    |      | x | CT             | (18) |          |          | A |
|    | MC1R      | Q01726 |                      |                    |      |   | ICL3           | (19) | 315      | sequence | A |
|    | GRM5      | P41594 |                      |                    |      | x | CT             | (1)  |          |          | C |
| C) | GLP1R     | P43220 | PLRLALLLLGMVGRAGPRPQ | 999999999999999999 | 6,43 |   | signal peptide |      |          |          | A |
|    | TACR1     | P25103 | LAHKRMRTVTNYFLVNL    | 999999999999999999 | 5,46 |   | H2             |      | 322      | sequence | A |
|    | NPY1R     | P25929 | SGNLALIIILKQKEMR     | 999999999999999999 | 5,46 |   | H1             |      | 338      | sequence | A |
|    | TRHR      | P34981 | YKDAIVISCGYKISRNY    | 89999999999999988  | 5,36 |   | ECL2           |      |          |          | A |
|    | MC2R      | Q01718 | ILENILILRNMGYLK      | 999999999999999999 | 5,14 |   | ECL1           |      | 293      | sequence | A |
|    | CRHR1     | P34998 | IGKLYDNEKCWFGK       | 999999999999999999 | 4,82 |   | ECL2           |      |          |          | B |
|    | HTR2A     | P28223 | FNSRTKAFLKIIAVW      | 8999999999999998   | 4,75 |   | H4             |      |          |          | A |
|    | NTSR1     | P30989 | RSRTKKFISAIWLAS      | 899999999999988    | 4,71 |   | H4             |      | 381, 383 | (20)     | A |
|    | TBXA2R    | P21731 | RTTEKELLIYLRVA       | 999999999999999999 | 4,50 |   | H7             |      |          |          | A |
|    | OXTR      | P30559 | RRRTDRLAVLATW        | 899999999999998    | 4,11 |   | H4             |      |          |          | A |
|    | FPR1      | P21462 | ATVRIRELLQGMYS       | 888888888888888    | 4,00 |   | ECL3           |      |          |          | A |
|    | PTGER3    | P43115 | PLLIMMLKMIFN         | 999999999999999999 | 3,86 |   | H6             |      | 358, 376 | sequence | A |

Proteins are divided into three groups based on the prediction results. Group A contains proteins and binding sites for which predictions were considered to be successful (i.e. proteins known to bind CaM by other methods and proteins which were predicted to bind CaM via the intracellular loop or C-terminal domain). Group B contains proteins that are shown to bind CaM by other methods, but for which binding could not be predicted with the Calmodulin Target Database and selected scoring criteria. Group C contains proteins that were predicted to bind to "nonsensical" sites on a receptor (i.e. N-terminal domain or transmembrane helix). Binding sites are divided to C-terminal "CT" and "other" sites. "Site" describes the binding sites more in detail. Palmitoylation sites "S-p Cys" and their references are shown. "Sequence" and "similarity" refer to the UniProt database description of the corresponding modification. GPCR classes into the receptors belong are shown.

TABLE S3 Distribution of predicted CaM binding sites to palmitoylated and non-palmitoylated GPCRs and intracellular domains.

|                   | ICL1 | ICL2 | ICL3 | CT   | Totally |   |
|-------------------|------|------|------|------|---------|---|
| Palmitoylated     | 9    | 8    | 19   | 6    | 42      |   |
|                   | 21,4 | 19,0 | 45,2 | 14,3 | 100,0   | % |
| Non-palmitoylated | 11   | 7    | 24   | 25   | 67      |   |
|                   | 16,4 | 10,4 | 35,8 | 37,3 | 100,0   | % |

## SUPPORTING REFERENCES

1. Minakami, R., N. Jinnai, and H. Sugiyama. 1997. Phosphorylation and Calmodulin Binding of the Metabotropic Glutamate Receptor Subtype 5 (mGluR5) Are Antagonistic in Vitro. *J. Biol. Chem.* 272:20291-20298.
2. Turner, J. H., A. K. Gelasco, and J. R. Raymond. 2004. Calmodulin Interacts with the Third Intracellular Loop of the Serotonin 5-Hydroxytryptamine 1A Receptor at Two Distinct Sites: Putative Role in Receptor Phosphorylation by Protein Kinase C. *J. Biol. Chem.* 279:17027-17037.
3. Lucas, J., D. Wang, and W. Sadée. 2006. Calmodulin Binding to Peptides Derived from the i3 Loop of Muscarinic Receptors. *Pharm. Res.* 23:647-653.
4. Sadeghi, H. M., G. Innamorati, M. Dagarag, and M. Birnbaumer. 1997. Palmitoylation of the V2 Vasopressin Receptor. *Mol. Pharmacol.* 52:21-29.
5. Nakajima, Y., T. Yamamoto, T. Nakayama, and S. Nakanishi. 1999. A Relationship between Protein Kinase C Phosphorylation and Calmodulin Binding to the Metabotropic Glutamate Receptor Subtype 7. *J. Biol. Chem.* 274:27573-27577.
6. Mahon, M. J., and M. Shimada. 2005. Calmodulin interacts with the cytoplasmic tails of the parathyroid hormone 1 receptor and a sub-set of class b G-protein coupled receptors. *FEBS Lett.* 579:803-807.
7. O'Dowd, B. F., M. Hnatowich, M. G. Caron, R. J. Lefkowitz, and M. Bouvier. 1989. Palmitoylation of the human beta 2-adrenergic receptor. Mutation of Cys341 in the carboxyl tail leads to an uncoupled nonpalmitoylated form of the receptor. *J. Biol. Chem.* 264:7564-7569.
8. Cherezov, V., D. M. Rosenbaum, M. A. Hanson, S. G. F. Rasmussen, F. S. Thian, T. S. Kobilka, H.-J. Choi, P. Kuhn, W. I. Weis, B. K. Kobilka, and R. C. Stevens. 2007. High-Resolution Crystal Structure of an Engineered Human  $\beta$ 2-Adrenergic G Protein–Coupled Receptor. *Science* 318:1258-1265.
9. Hanson, M. A., V. Cherezov, C. B. Roth, M. T. Griffith, V.-P. Jaakola, E. Y. T. Chien, J. Velasquez, P. Kuhn, and R. C. Stevens. 2008. A specific cholesterol binding site is established by the 2.8 Å structure of the human  $\beta$ (2)-adrenergic receptor in an alternate crystal form. *Structure (London, England : 1993)* 16:897-905.
10. Huang, Y., Y. Zhou, H.-C. Wong, A. Castiblanco, Y. Chen, E. M. Brown, and J. J. Yang. 2010. Calmodulin Regulates Ca<sup>2+</sup>-sensing Receptor-mediated Ca<sup>2+</sup> Signaling and Its Cell Surface Expression. *J. Biol. Chem.* 285:35919-35931.
11. Woods, A. S., D. Marcellino, S. N. Jackson, R. Franco, S. Ferré, L. F. Agnati, and K. Fuxe. 2008. How Calmodulin Interacts with the Adenosine A2A and the Dopamine D2 Receptors. *J. Proteome Res.* 7:3428-3434.
12. Bofill-Cardona, E., O. Kudlacek, Q. Yang, H. Ahorn, M. Freissmuth, and C. Nanoff. 2000. Binding of Calmodulin to the D2-Dopamine Receptor Reduces Receptor Signaling by Arresting the G Protein Activation Switch. *J. Biol. Chem.* 275:32672-32680.

13. Okamoto, Y., H. Ninomiya, M. Tanioka, A. Sakamoto, S. Miwa, and T. Masaki. 1997. Palmitoylation of Human EndothelinB : ITS CRITICAL ROLE IN G PROTEIN COUPLING AND A DIFFERENTIAL REQUIREMENT FOR THE CYTOPLASMIC TAIL BY G PROTEIN SUBTYPES. *J. Biol. Chem.* 272:21589-21596.
14. Labasque, M., E. Reiter, C. Becamel, J. Bockaert, and P. Marin. 2008. Physical Interaction of Calmodulin with the 5-Hydroxytryptamine 2C Receptor C-Terminus Is Essential for G Protein-independent, Arrestin-dependent Receptor Signaling. *Mol. Biol. Cell* 19:4640-4650.
15. Jin, H., Z. Xie, S. R. George, and B. F. O'Dowd. 1999. Palmitoylation occurs at cysteine 347 and cysteine 351 of the dopamine D1 receptor. *Eur. J. Pharmacol.* 386:305-312.
16. Wang, D., W. Sadée, and J. M. Quillan. 1999. Calmodulin Binding to G Protein-coupling Domain of Opioid Receptors. *J. Biol. Chem.* 274:22081-22088.
17. Nickols, H. H., V. N. Shah, W. J. Chazin, and L. E. Limbird. 2004. Calmodulin Interacts with the V2 Vasopressin Receptor: Elimination of Binding to the C Terminus Also Eliminates Arginine Vasopressin-Stimulated Elevation of Intracellular Calcium. *J. Biol. Chem.* 279:46969-46980.
18. Turner, J. H., and J. R. Raymond. 2005. Interaction of Calmodulin with the Serotonin 5-Hydroxytryptamine<sub>2A</sub> Receptor: A Putative Regulator of G Protein Coupling and Receptor Phosphorylation by Protein Kinase C. *J. Biol. Chem.* 280:30741-30750.
19. Zhang, Y., D. Wang, and W. Sadée. 2005. Calmodulin interaction with peptides from G-protein coupled receptors measured with S-Tag labeling. *Biochem. Biophys. Res. Commun.* 333:390-395.
20. Heakal, Y., M. P. Woll, T. Fox, K. Seaton, R. Levenson, and M. Kester. 2011. Neurotensin receptor-1 inducible palmitoylation is required for efficient receptor-mediated mitogenic-signaling within structured membrane microdomains. *Cancer Biology & Therapy* 12:427-435.
